# Supplementary material for: Photodegradation of RhB over YVO4/g-C3N4 composites under visible light irradiation
Source: Royal Society of Chemistry journal article supplement (doi:10.1039/c3ra43592j), 2013-01-01
Supplement: c3ra43592j.pdf [file c3ra43592j.pdf]

## Supplementary Materials

### Photodegradation of RhB over $\text{YVO}_4/\text{g-C}_3\text{N}_4$ composites under visible light irradiation

Jun Cai<sup>a</sup>, Yiming He\*<sup>a</sup>, Xiaoxing Wang<sup>a</sup>, Lihong Zhang<sup>a</sup>, Lvzhuo Dong<sup>b</sup>, Hongjun Lin<sup>c</sup>,

Leihong Zhao<sup>b</sup>, Xiaodong Yi<sup>d</sup>, Weizheng Weng<sup>d</sup> and Huilin Wan<sup>d</sup>

<sup>a</sup> *Department of Materials Physics, Zhejiang Normal University, Jinhua, 321004, China*

<sup>b</sup> *Institute of Physical Chemistry, Zhejiang Key Laboratory for Reactive Chemistry on Solid Surfaces, Zhejiang*

*Normal University, Jinhua, 321004, China*

<sup>c</sup> *College of Geography and Environmental Sciences, Zhejiang Normal University, Jinhua, 321004, China*

<sup>d</sup> *State Key Laboratory Physical Chemistry of Solid Surfaces, Xiamen University, Xiamen 361005, PR China*

Corresponding author. Tel: +86-0579-83792294; Fax: +86-0579-83714946

E-mail address: [hym@zjnu.cn](mailto:hym@zjnu.cn) (Y. He)

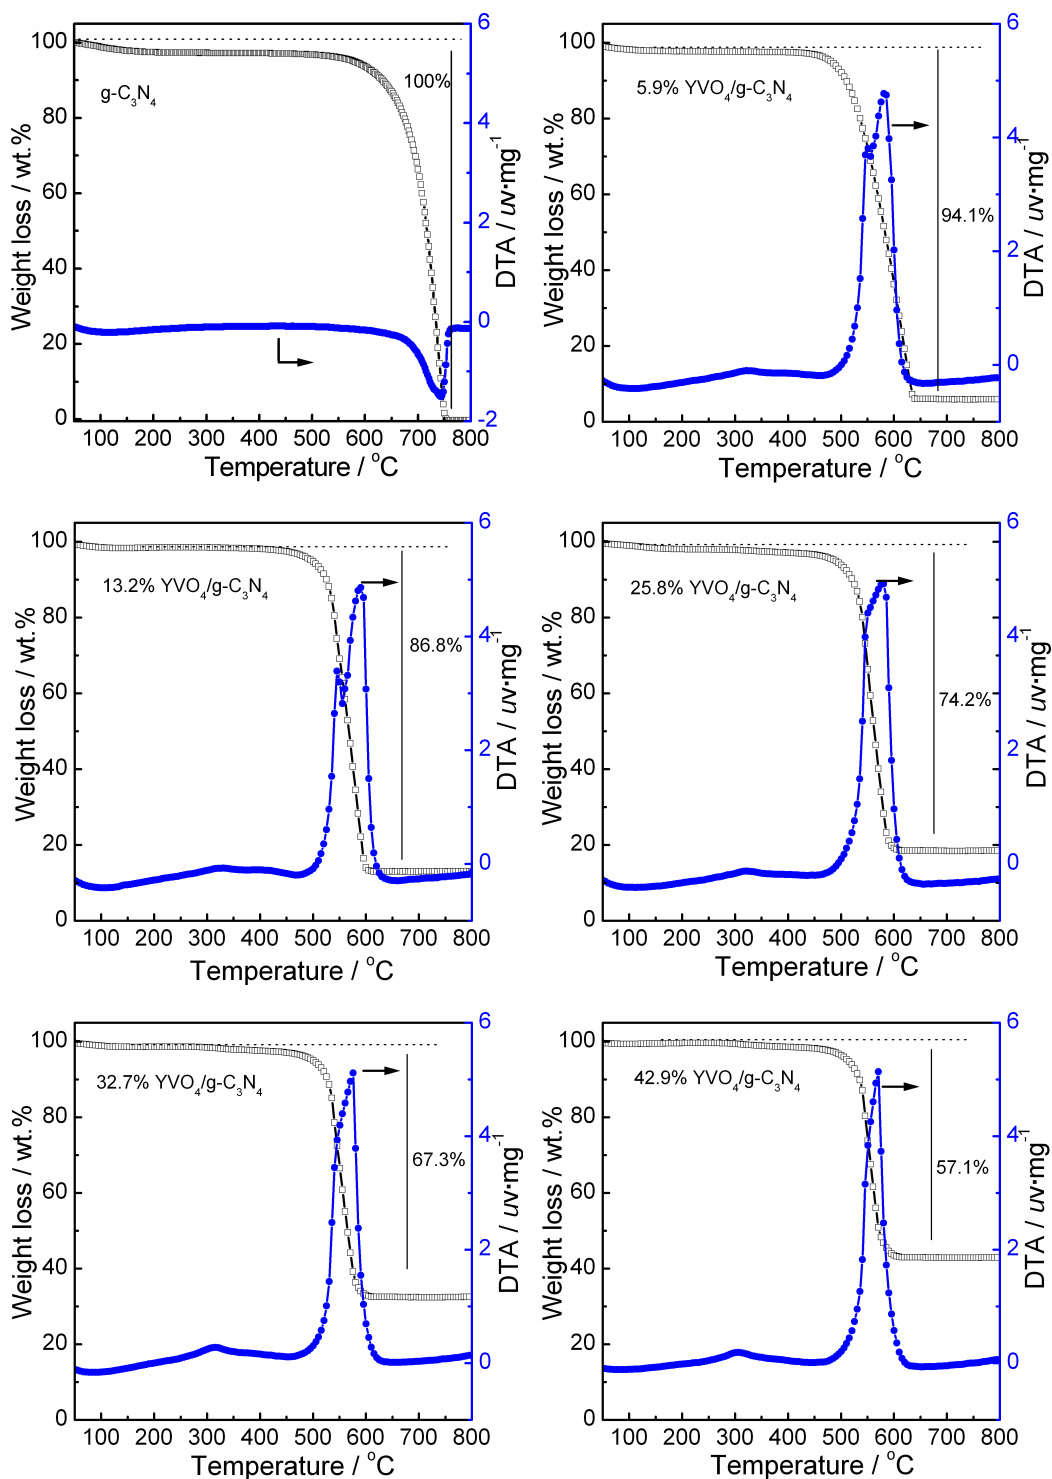

Fig. S1. TG-DTA profiles of  $\text{g-C}_3\text{N}_4$  and  $\text{YVO}_4/\text{g-C}_3\text{N}_4$  composites.

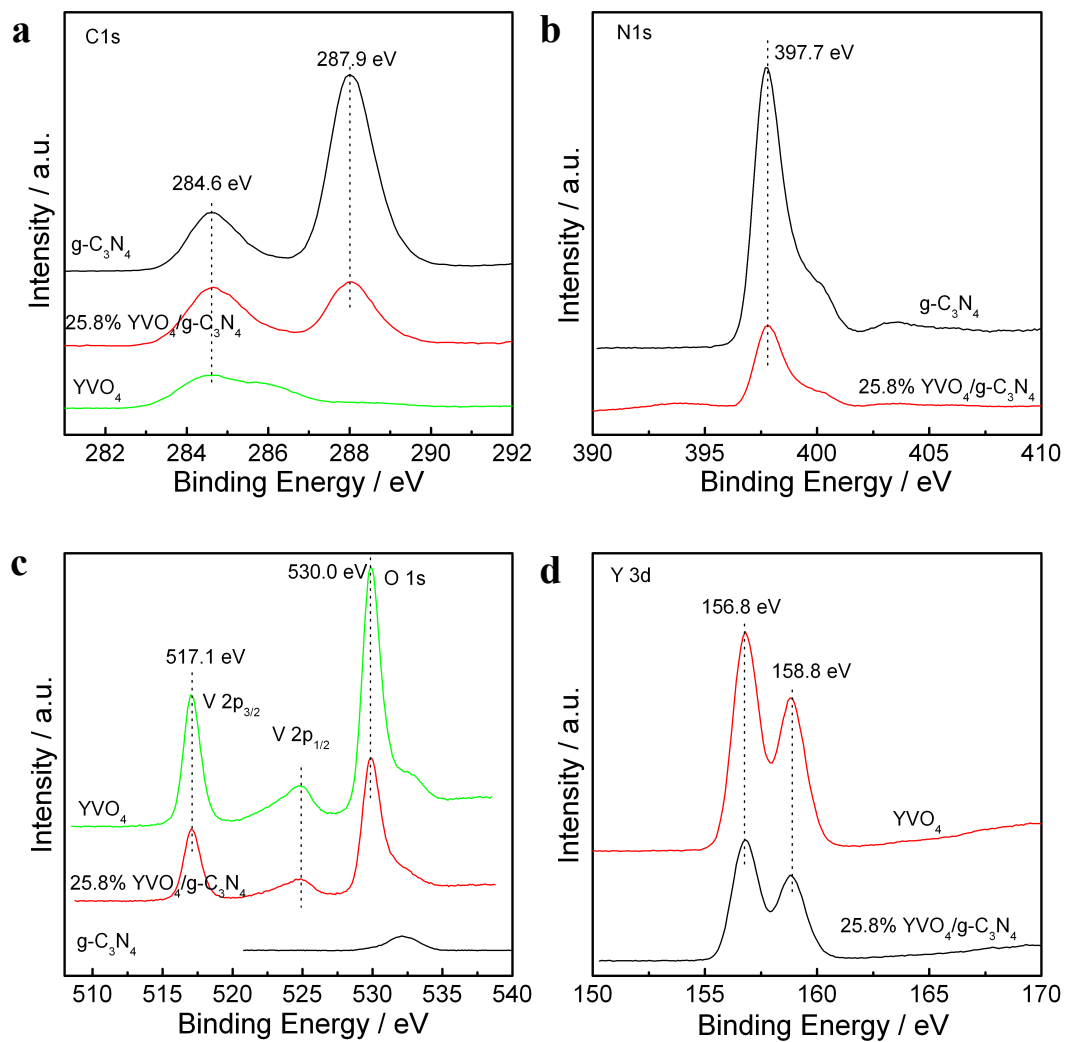

**Fig. S2.** XPS spectra of g-C<sub>3</sub>N<sub>4</sub>, YVO<sub>4</sub>, 25.8%YVO<sub>4</sub>/g-C<sub>3</sub>N<sub>4</sub> composites (a) high-resolution XPS (HR-XPS) spectra of C 1s, (b) HR-XPS spectra of N 1s, (c) HR-XPS spectra of V 3d and O1s, (d) HR-XPS spectra of Y 3d.

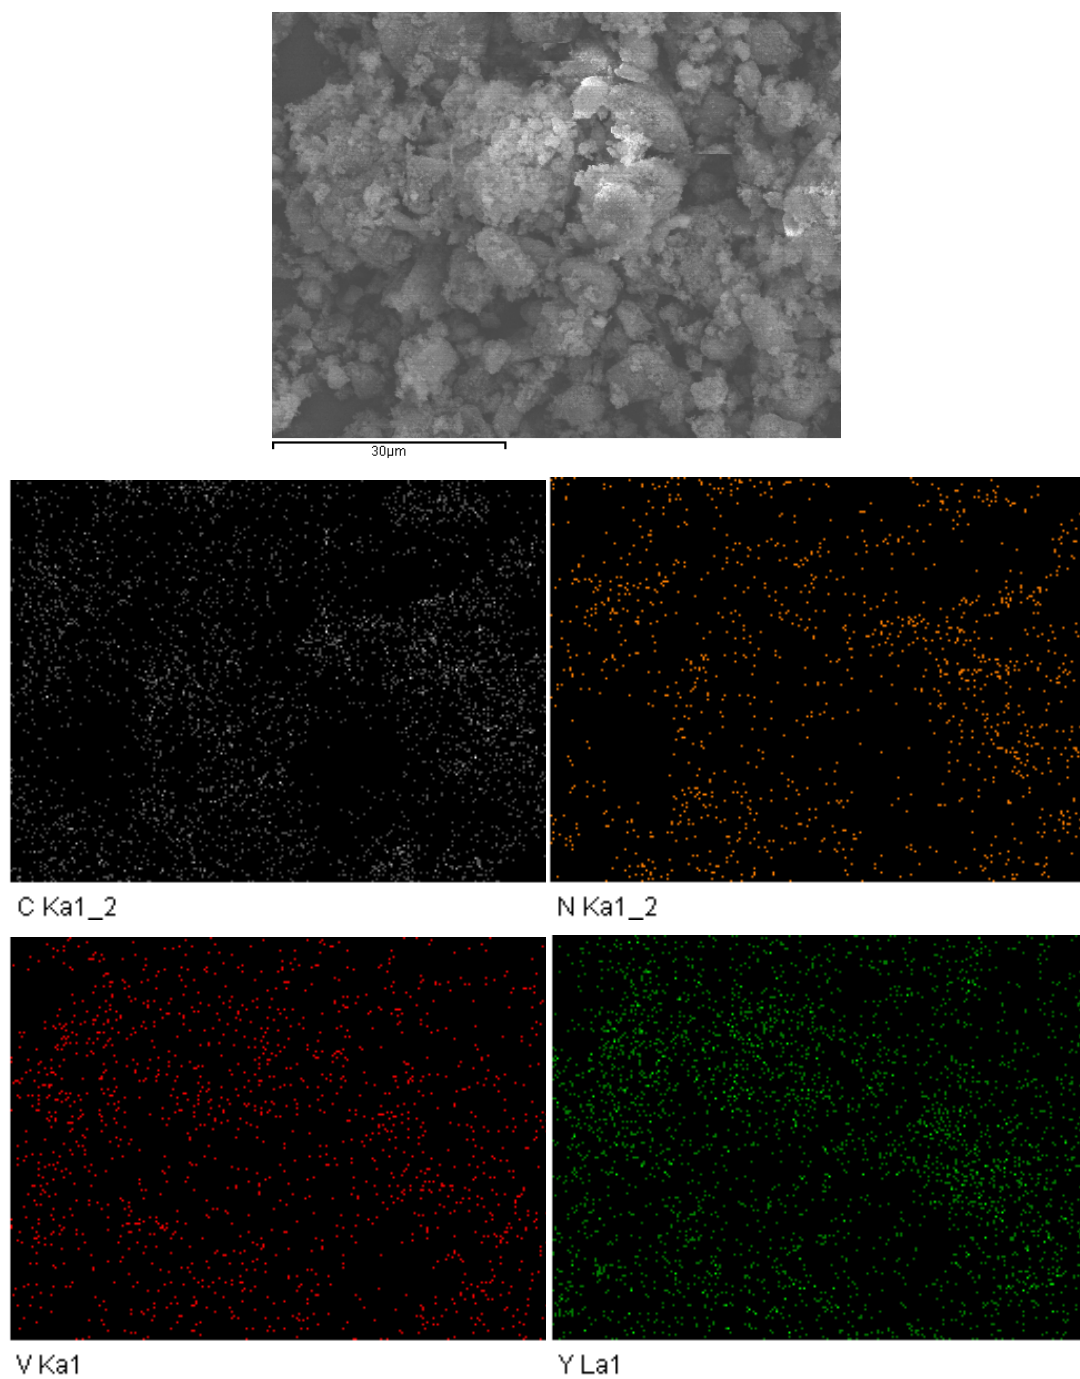

**Fig. S3.** X-ray elemental maps of 25.8% YVO<sub>4</sub>/g-C<sub>3</sub>N<sub>4</sub> composite.

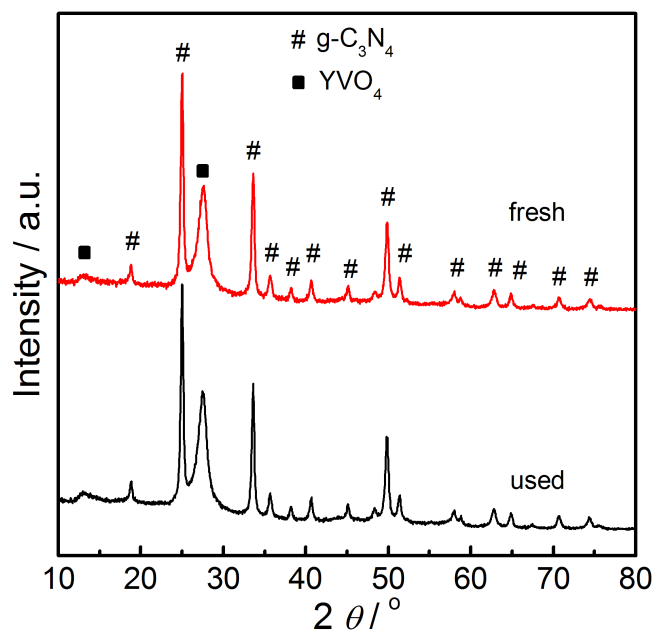

**Fig. S4.** XRD patterns of 25.8% YVO<sub>4</sub>/g-C<sub>3</sub>N<sub>4</sub> composite before and after reaction.
